# Supplementary figures and images for: Spleen stiffness measurement as a non-invasive assessment in patients with portal hypertension
Source: HighWire-hosted journal article supplement (doi:10.1136/egastro-2023-100031), 2024-02-01

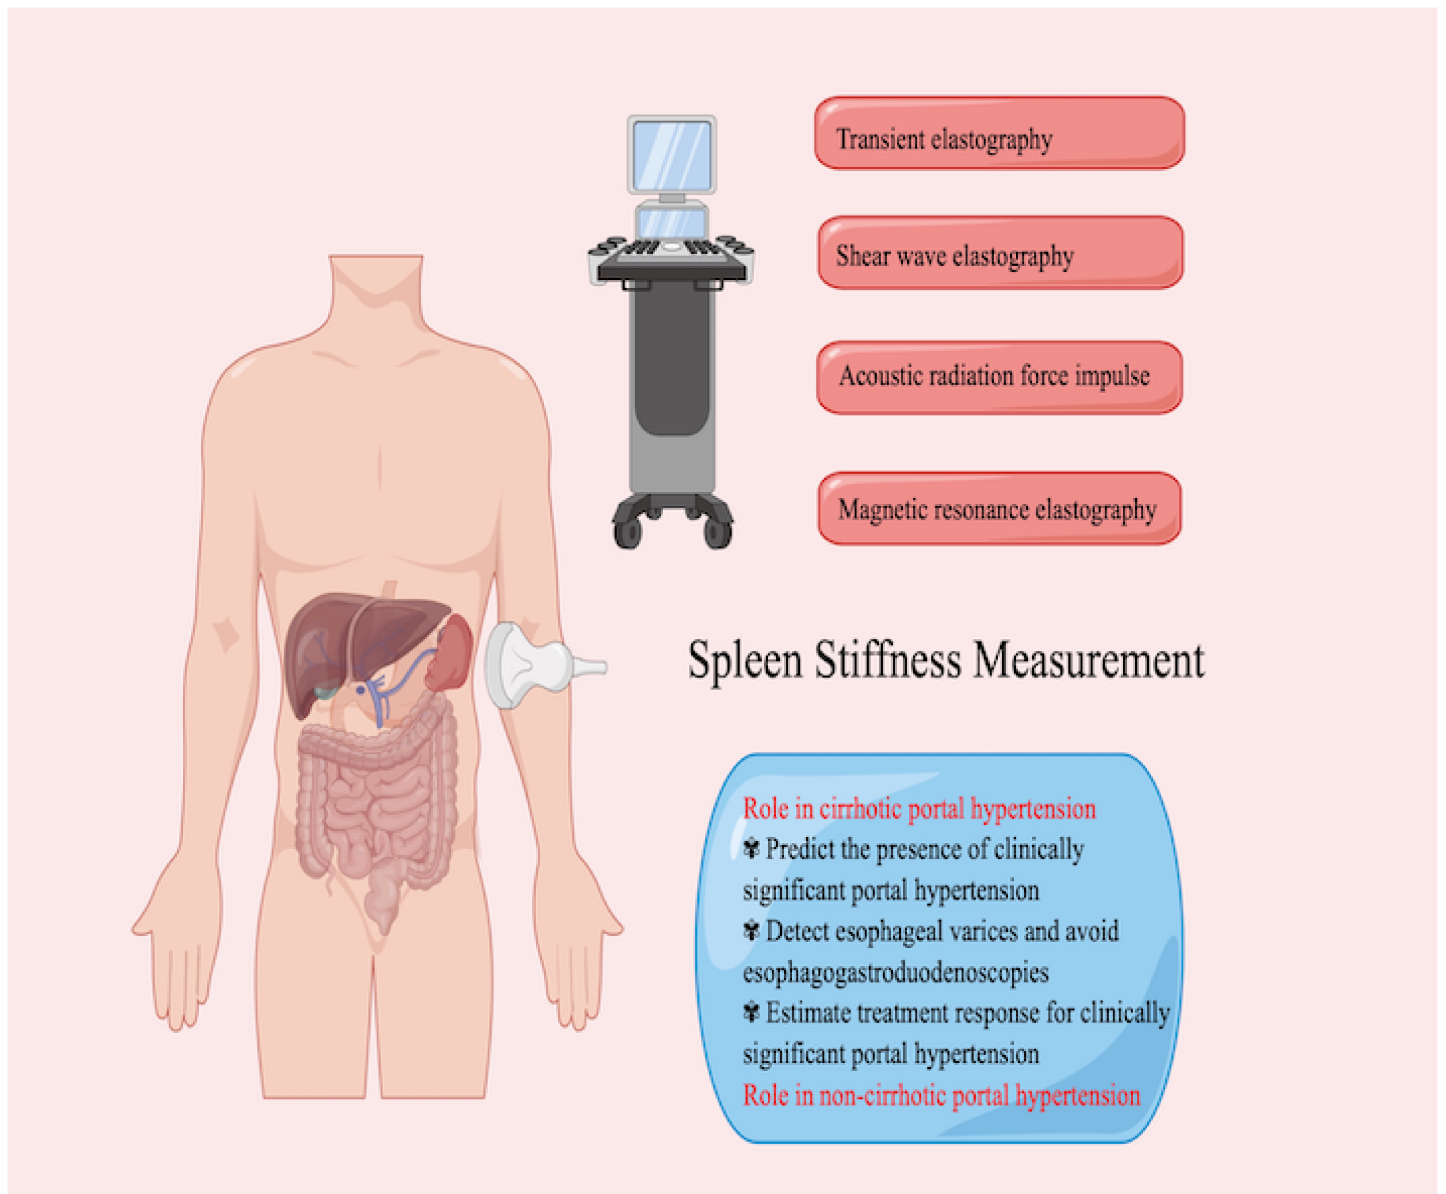

Supplement: egastro-2023-100031supp001_data_supplement.pdf [file egastro-2023-100031supp001_data_supplement.pdf]
